# Supplementary material for: Epigenetic Regulatory Effect of Exercise on Glutathione Peroxidase 1 Expression in the Skeletal Muscle of Severely Dyslipidemic Mice
Source: PubMed Central journal article supplement (PMC4806847; doi:10.1371/journal.pone.0151526), 2016-03-24
Supplement: pone.0151526.s001.pdf [file pone.0151526.s001.pdf]

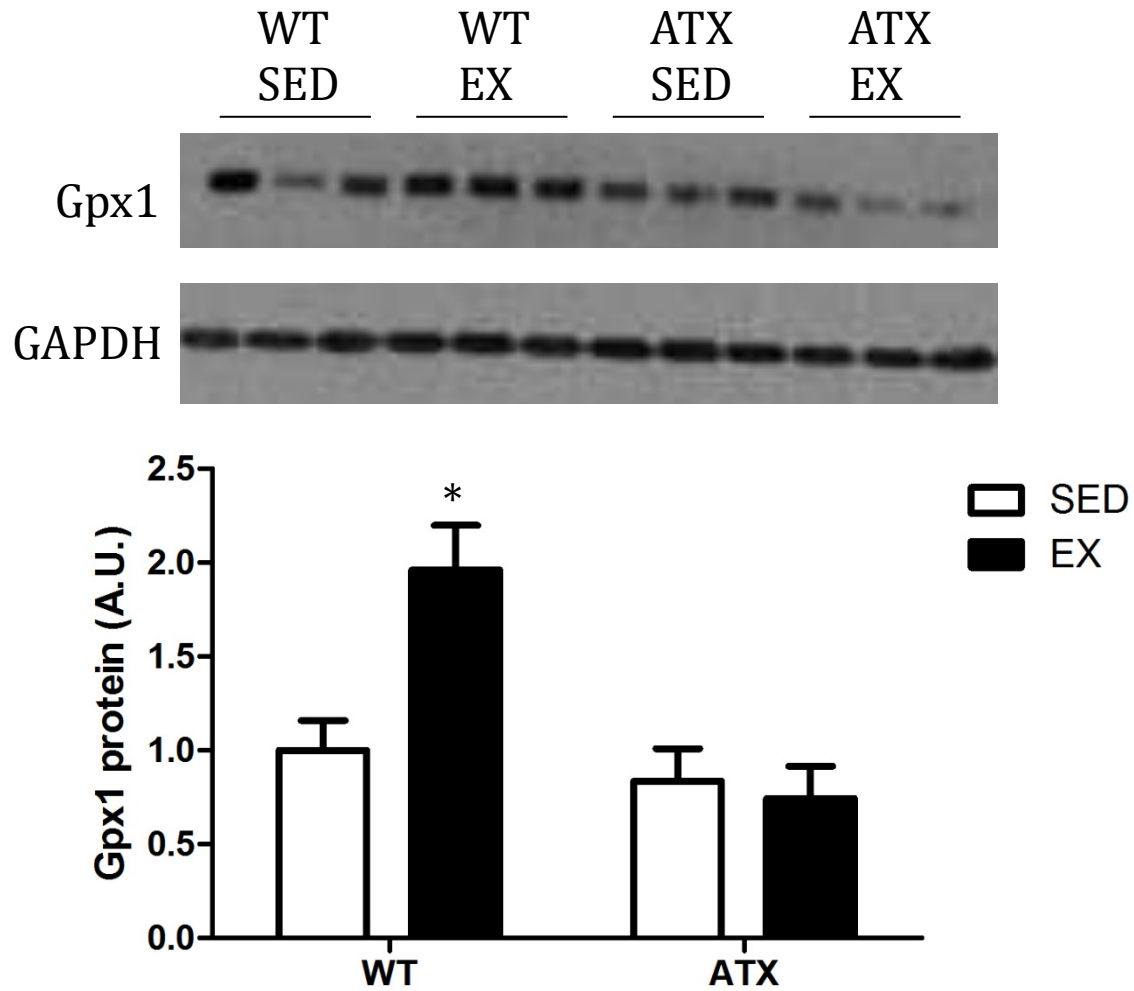

**S1 Fig. Gpx1 protein expression.** Protein were extracted from skeletal muscle of wild-type (WT) and dyslipidemic (ATX) mice in the sedentary (SED) and exercise (EX) groups. Data are mean  $\pm$  SEM, n=6 mice per group. \*: p<0.05 vs. WT-SED (Two-way ANOVA).
