# Supplementary material for: Epigenetic Regulatory Effect of Exercise on Glutathione Peroxidase 1 Expression in the Skeletal Muscle of Severely Dyslipidemic Mice
Source: PubMed Central journal article supplement (PMC4806847; doi:10.1371/journal.pone.0151526), 2016-03-24
Supplement: pone.0151526.s002.pdf [file pone.0151526.s002.pdf]

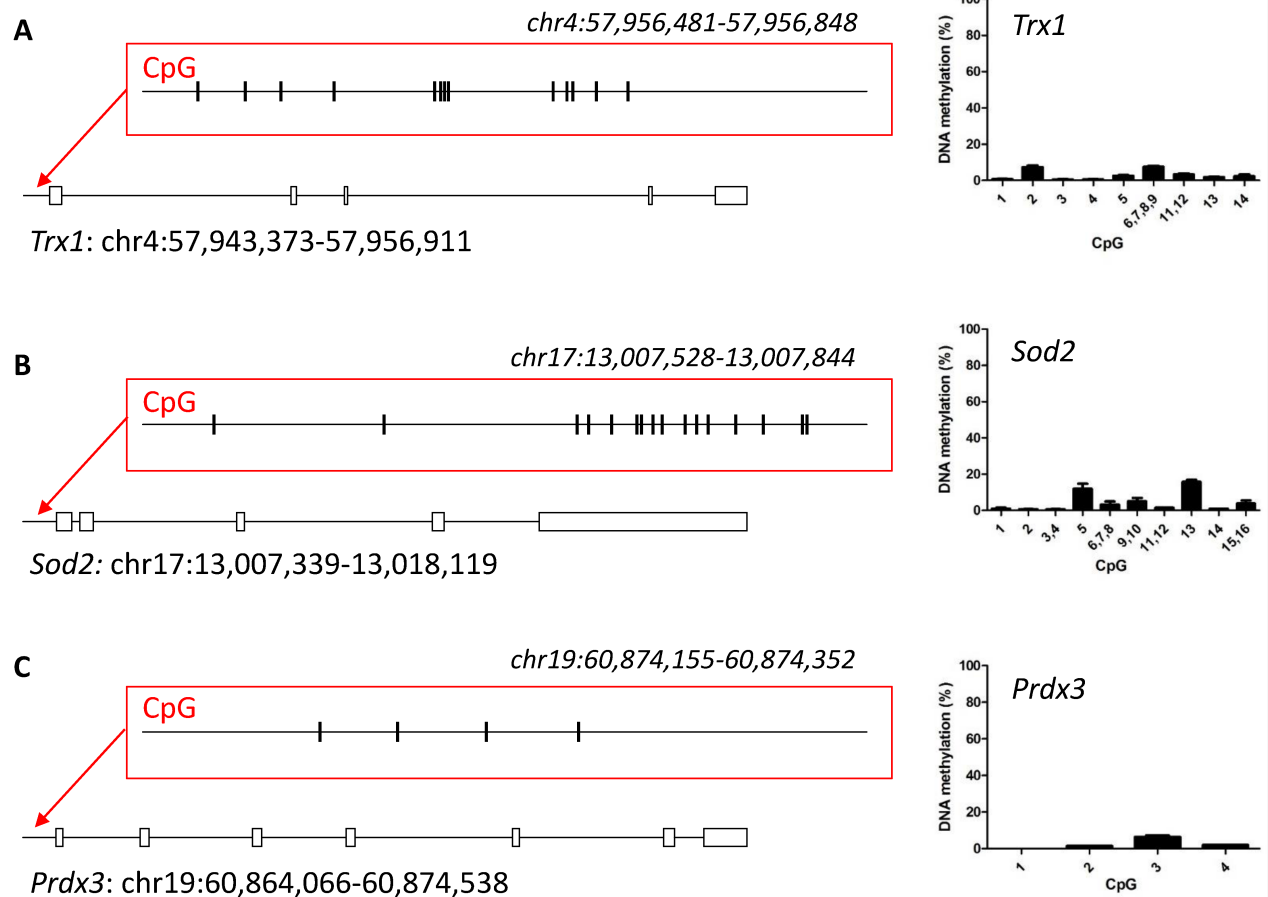

**S2 Fig. CpG methylation analysis of *Prdx3*, *Sod2* and *Trx1*.** *Prdx3*: peroxiredoxin 3; *Sod2*: superoxide dismutase 2, mitochondrial; *Trx1*: thioredoxin 1.
