# Supplementary material for: Epigenetic Regulatory Effect of Exercise on Glutathione Peroxidase 1 Expression in the Skeletal Muscle of Severely Dyslipidemic Mice
Source: PubMed Central journal article supplement (PMC4806847; doi:10.1371/journal.pone.0151526), 2016-03-24
Supplement: pone.0151526.s003.pdf [file pone.0151526.s003.pdf]

**S1 Table. Primer sequences used for qPCR analysis.** UCP2/3: uncoupling protein (mitochondrial proton carrier) 2/3; NOX2/4: NADPH oxidase 2/3; Trx1: thioredoxin 1; SOD2: superoxide dismutase 2, mitochondrial; Prdx3: peroxiredoxin 3; Gpx1: glutathione peroxidase 1.

| Gene  | Primer sequence                                        |
|-------|--------------------------------------------------------|
| UCP2  | (F) CTCGTCTTGCCGATTGAAGGT<br>(R) TCTGCAATGCAGGCAGCTGTC |
| UCP3  | (F) GAGAAGTTGCTGGAGTCTCAC<br>(R) GAGCCACCATCTTCAGCATAC |
| NOX2  | (F) AGTGCCCAGTACCAAAGTTC<br>(R) GTCCACCTCCATCTTGAATC   |
| NOX4  | (F) CCTTTGTGCCTTTATTGTGCG<br>(R) GAATCGTTCTGTCCAGTCTCC |
| Trx1  | (F) AATGGTGAAGCTGATCGAGAC<br>(R) TTTCCCTTGTTAGCACCGGAG |
| SOD2  | (F) GGCCAAGGGAGATGTTACAA<br>(R) GCTTGATAGCCTCCAGCAAC   |
| Prdx3 | (F) TCGGTATCTCCGCCTATCGT<br>(R) GAGGAACTGGTGCTAAAGGCT  |
| GPx1  | (F) CACCGAGATGAACGATCTG<br>(R) CAGGTCGGACGTACTIONGAG   |
