# Supplementary material for: Epigenetic Regulatory Effect of Exercise on Glutathione Peroxidase 1 Expression in the Skeletal Muscle of Severely Dyslipidemic Mice
Source: PubMed Central journal article supplement (PMC4806847; doi:10.1371/journal.pone.0151526), 2016-03-24
Supplement: pone.0151526.s004.pdf [file pone.0151526.s004.pdf]

**S2 Table. Primer sequences used for DNA methylation analysis.** Gpx1: glutathione peroxidase 1; Prdx3: peroxiredoxin 3; Sod2: superoxide dismutase 2, mitochondrial; Trx1: thioredoxin 1.

| <b>Gene</b>  | <b>EPITYPER Primer sequence</b>                                                                         |
|--------------|---------------------------------------------------------------------------------------------------------|
| <i>Gpx1</i>  | (F)aggaagagagGGGATTTTGAGATTTAGAGTTGGTT<br>(R)cagtaatacgactcactatagggagaaggctATTCTCAATAACAACACCTTACCC    |
| <i>Prdx3</i> | (F)aggaagagagTTAGGTTTGGGTGTTTTAGTGAAGA<br>(R)cagtaatacgactcactatagggagaaggctCCCTTAAATCTACTACCCACTAACTCC |
| <i>Sod2</i>  | (F)aggaagagagATGTTAGGTTAGGTTTTAGGGAAGG<br>(R)cagtaatacgactcactatagggagaaggctTCCCCTATACCAAATTAATAAAAACC  |
| <i>Trx1</i>  | (F)aggaagagagTTAGTGTAGTTTGGGGATTGTTTTA<br>(R)cagtaatacgactcactatagggagaaggctCCCTAATCTAAAAATACACCTCTACC  |
